# Supplementary material for: Cytological and molecular characterization of carotenoid accumulation in normal and high-lycopene mutant oranges
Source: PubMed Central journal article supplement (PMC5429694; doi:10.1038/s41598-017-00898-y), 2017-04-10
Supplement: 41598_2017_898_MOESM1_ESM.pdf [file 41598_2017_898_MOESM1_ESM.pdf]

## **Cytological and molecular characterization of carotenoid accumulation in normal and high-lycopene mutant oranges**

Peng-jun Lu, Chun-yan Wang, Ting-ting Yin, Si-lin Zhong, Don Grierson, Kun-song Chen & Chang-jie Xu

### **Supplementary data**

**Figure S1.** Carotenoid biosynthetic pathway in higher plants with the sites inhibited by CPTA and NFZ indicated.

**Figure S2.** The mRNA sequences of *phytoene synthase 1 (PSY1)* alleles, *PSY1-a* and *PSY1-b*, in Newhall and Cara Cara oranges.

**Figure S3.** The mRNA sequences of *lycopene  $\beta$ -cyclase (LCYB)* alleles, *LCYB-a* and *LCYB-b*, in Newhall and Cara Cara oranges.

**Figure S4.** The mRNA sequences of *chromoplast-specific lycopene  $\beta$ -cyclase (CYCB)* alleles, *CYCB-a* and *CYCB-b*, in Newhall and Cara Cara oranges.

**Figure S5.** The observation of red crystalline chromoplast under the light microscope in 2-(4-chlorophenylthio)-triethylamine hydrochloride (CPTA) treated albedo layers of Newhall, control Newhall and control Cara Cara oranges.

**Table S1.** List of primers for real-time quantitative PCR.

**Table S2.** Effects of 2-(4-chlorophenylthio)-triethylamine hydrochloride (CPTA) and norflurazon treatments on accumulation of carotenoids in *in vitro* cultured flesh tissues of Newhall and Cara Cara.

**Table S3.** List of primers for full-length gene cloning.

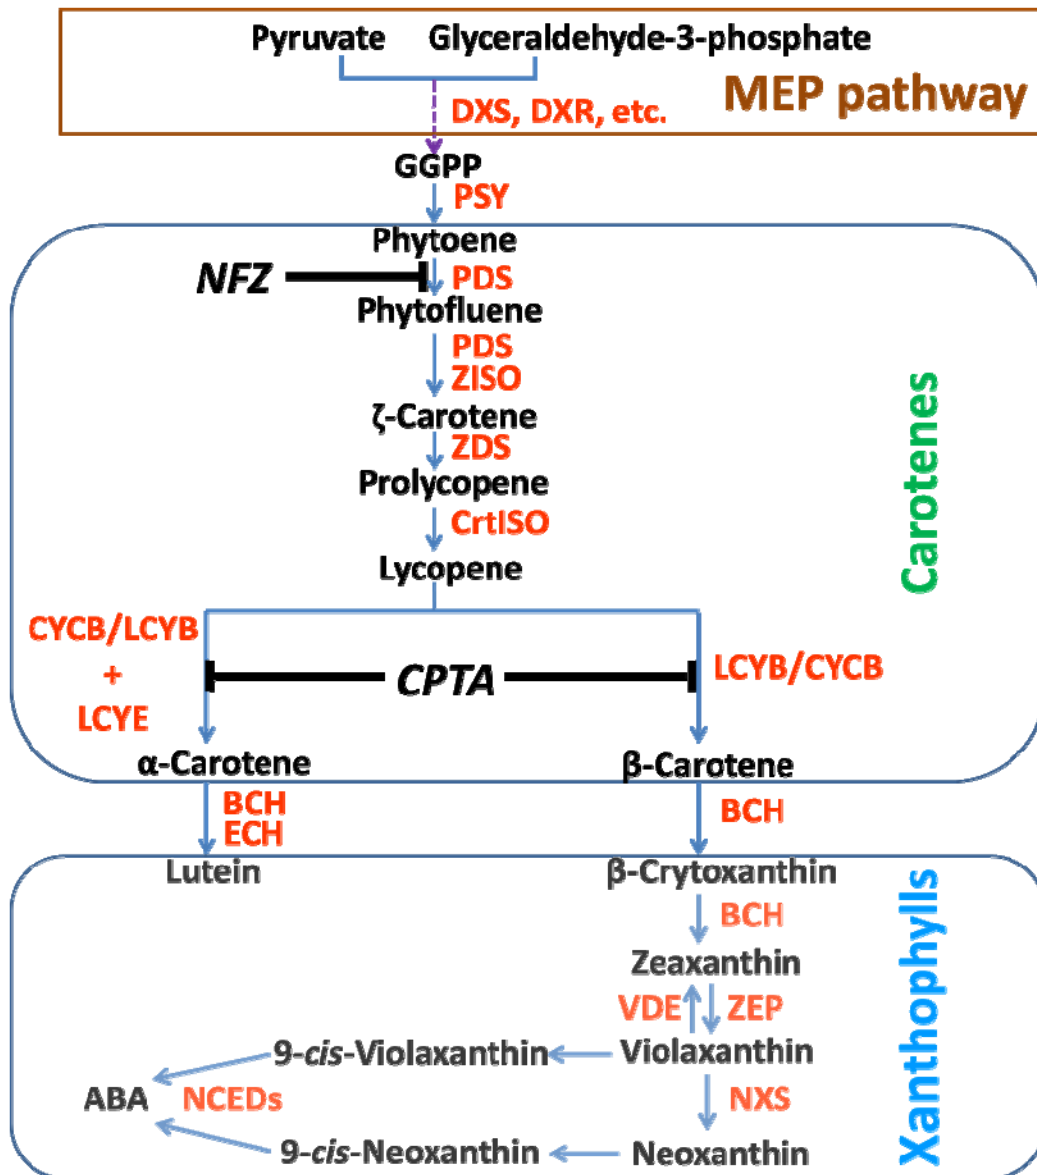

**Supplementary Fig. S1.** Carotenoid biosynthetic pathway in higher plants with the sites inhibited by CPTA and NFZ indicated. BCH,  $\beta$ -carotene hydroxylase; CPTA, 2-(4-chlorophenylthio)-triethylamine hydrochloride; CRTISO, carotene isomerase; CYCB, chromoplast-specific lycopene  $\beta$ -cyclase; DXS, 1-deoxy-D-xylulose 5-phosphate-synthase; DXR, 1-deoxy-D-xylulose 5-phosphate reductoisomerase; ECH,  $\epsilon$ -carotene hydroxylase; GGPP, geranylgeranyl diphosphate; LCYB, lycopene  $\beta$ -cyclase; LCYE, lycopene  $\epsilon$ -cyclase; MEP, 2-C-methyl-D-erythritol 4-phosphate; NCED, nine-*cis*-epoxycarotenoid dioxygenase; NFZ, norflurazon; NXS, neoxanthin synthase; PDS, phytoene desaturase; PSY, phytoene synthase; VDE, violaxanthin de-epoxidase; ZDS,  $\zeta$ -carotene desaturase; ZEP, zeaxanthin epoxidase; ZISO, 15-*cis*- $\zeta$ -carotene isomerase

PSY1-a : CTACAGAGAGTTGAAGTTACAGGGGCCTCAA TTTTCTTTTATCCAAAAAATAATTTTACAGCATGCTCTGTT CATT : 82  
 PSY1-b : CTACAGAGAGTTGAAGTTACAGGGGCCTCAA TTTTCTTTTATCCAAAAAATAATTTTACAGCATGCTCTGTT CATT : 82

PSY1-a : GCTGTGGGTTGTATCACCTAACTCACAATTTGCCAATGCTTCGGGTTTCGTCGATT CAGTTCGAGAGGAAAACAGGCTGTTT : 164  
 PSY1-b : GCTGTGGGTTGTATCACCTAACTCACAATTTGCCAATGCTTCGGGTTTCGTCGATT CAGTTCGAGAGGAAAACAGGCTGTTT : 164

PSY1-a : TATTCATCAAGATTTCTTACCAACATCAAACCCGGACTGCTGTGTTAATTTAGACCTAAGCAGTTTAAATAAT TAATA : 246  
 PSY1-b : TATTCATCAAGATTTCTTACCAACATCAAACCCGGACTGCTGTGTTAATTTAGACCTAAGCAGTTTAAATAAT TAATA : 246

PSY1-a : A-----GCAGAGACGGGAATTCCTATCCCTTAGATACAGATTTGAGGCATCCTTGCTCATCTGGAATCGACTTGCCTGAAAT : 322  
 PSY1-b : ATAAATAACGGGAATTCCTATCCCTTAGATACAGATTTGAGGCATCCTTGCTCATCTGGAATCGACTTGCCTGAAAT : 328

PSY1-a : ATCATGTATGGTTGCTAGCACTGCTGGAGAAGTGGCCATGCTTCAGAAGAAATGGTTTACAATGTTGTGCTCAAGCAGGCA : 404  
 PSY1-b : ATCATGTATGGTTGCTAGCACTGCTGGAGAAGTGGCCATGCTTCAGAAGAAATGGTTTACAATGTTGTGCTCAAGCAGGCA : 410

PSY1-a : GCCTTGGTTAATAAGCAACCAAGTGGGGTACTCGTGATCTTGATGTGAACCCAGATATTGCTTTACCCGGAACCTTAAAGTC : 486  
 PSY1-b : GCCTTGGTTAATAAGCAACCAAGTGGGGTACTCGTGATCTTGATGTGAACCCAGATATTGCTTTACCCGGAACCTTAAAGTC : 492

PSY1-a : TGCTCAGTGAAGCTTATGATCGTGTGGAGAAGTTTGCGCCGAGTATGCTAAGACATTTACTTGGGAACCTTGTGCTGATGAC : 568  
 PSY1-b : TGCTCAGTGAAGCTTATGATCGTGTGGAGAAGTTTGCGCCGAGTATGCTAAGACATTTACTTGGGAACCTTGTGCTGATGAC : 574

PSY1-a : CTCTGAAGGGCAAGGGCTATATGGGCTATATGTGTGGTGTAGGAGGACAGATGAGCTCGTTGATGGGCTTAATGCTTCA : 650  
 PSY1-b : CTCTGAAGGGCAAGGGCTATATGGGCTATATGTGTGGTGTAGGAGGACAGATGAGCTCGTTGATGGGCTTAATGCTTCA : 656

PSY1-a : CACATAACTCCAACAGCTTTAGACAGGTGGGAGTCCAGGTTGGAAGACCTTTCCGGGGTTCGTCATTGATATGCTTGATG : 732  
 PSY1-b : CACATAACTCCAACAGCTTTAGACAGGTGGGAGTCCAGGTTGGAAGACCTTTCCGGGGTTCGTCATTGATATGCTTGATG : 738

PSY1-a : CTGCATTATCAGATACAGTAAACAAATTTCTGTGACATTCAGCCATTCAGAGATATGATAGAAGGAAATGAGGATGGACCT : 814  
 PSY1-b : CTGCATTATCAGATACAGTAAACAAATTTCTGTGACATTCAGCCATTCAGAGATATGATAGAAGGAAATGAGGATGGACCT : 820

PSY1-a : TAGGAAGTCAAGATACAAAACTTTGATGAATTATACTTGTATTGTTATTATGTTGCTGGGACCGTAGGGCTAATGAGTGT : 896  
 PSY1-b : TAGGAAGTCAAGATACAAAACTTTGATGAATTATACTTGTATTGTTATTATGTTGCTGGGACCGTAGGGCTAATGAGTGT : 902

PSY1-a : CCAGTTATGGGCATAGCACCTGACTCACAGGCAACAACAGAGAGCGTCTACAATGCAGCATTGGCACTAGGGATTGCTAATC : 978  
 PSY1-b : CCAGTTATGGGCATAGCACCTGACTCACAGGCAACAACAGAGAGCGTCTACAATGCAGCATTGGCACTAGGGATTGCTAATC : 984

PSY1-a : AGCTCACTAACATACTCAGAGATGTTGGAGAGGATGCCCAAGAGGAAGGGTTTATCTACCACAAGATGAGTTGGCACAGGC : 1060  
 PSY1-b : AGCTCACTAACATACTCAGAGATGTTGGAGAGGATGCCCAAGAGGAAGGGTTTATCTACCACAAGATGAGTTGGCACAGGC : 1066

PSY1-a : AGGGCTTTAGATGATGACATATTTGCTGGAGAGGTGACCTTAAATGGGAAACTTCATGAAGAACCAATTAAGAGGGCA : 1142  
 PSY1-b : AGGGCTTTAGATGATGACATATTTGCTGGAGAGGTGACCTTAAATGGGAAACTTCATGAAGAACCAATTAAGAGGGCA : 1148

PSY1-a : AGGATGTTCTTTGATATGGCTGAGAACCGTGTGACCGAGCTGAGTGAAGCTAGT GATGGCCGATGGGCTTCATTGCTGT : 1224  
 PSY1-b : AGGATGTTCTTTGATATGGCTGAGAACCGTGTGACCGAGCTGAGTGAAGCTAGT GATGGCCGATGGGCTTCATTGCTGT : 1230

PSY1-a : TGTACCGGCAAAATACTGGATGAGATTGAGGCCAATGATTACAACAACCTTCACAAGAGAGCTTATGTTGAGTAAAGCCAAGAA : 1306  
 PSY1-b : TGTACCGGCAAAATACTGGATGAGATTGAGGCCAATGATTACAACAACCTTCACAAGAGAGCTTATGTTGAGTAAAGCCAAGAA : 1312

PSY1-a : GATAGCTGCACCTACCAATTGCATATGCAAAATCCCTCTTACGCCCGTCAAGAAATATATACCAGTAAGGCTTAAACTGAACAT : 1388  
 PSY1-b : GATAGCTGCACCTACCAATTGCATATGCAAAATCCCTCTTACGCCCGTCAAGAAATATATACCAGTAAGGCTTAAACTGAACAT : 1394

PSY1-a : TTAACATCAAAGTTTAGAAGCATATATAGTTGAAACGGATTCAAAGTGGAAA AAAAATGAAAATGATTGCTTGAATATTAG : 1470  
 PSY1-b : TTAACATCAAAGTTTAGAAGCATATATAGTTGAAACGGATTCAAAGTGGAAA AAAAATGAAAATGATTGCTTGAATATTAG : 1476

PSY1-a : GAATTGTTGGTATGCAGCATGTATTTGATGGTAAAGTTAGAATAGTGAATCCAATTCACAATCCAAGGCCGATGCCCTA : 1549  
 PSY1-b : GAATTGTTGGTATGCAGCATGTATTTGATGGTAAAGTTAGAATAGTGAATCCAATTCACAATCCAAGGCCGATGCCCTA : 1555

**Supplementary Fig. S2.** The mRNA sequences of *phytoene synthase 1 (PSY1)* alleles, *PSY1-a* and *PSY1-b*, in Newhall and Cara Cara oranges. Note that, no difference in sequence was observed between the two oranges. Start codon and stop codon are underlined by red.

```

*          20          *          40          *          60          *          80
LCYB-a : ACCAGGAGCTTAGGTTTGGTCTCAAGAAGTCTCGTCAAAGAGGAATACGAGTTGTTTCATTAAGGCTAGTAGTAGTCTCT : 82
LCYB-b : ACCAGGAGCTTAGGTTTGGTCTCAAGAAGTCTCGTCAAAGAGGAATAGAGTTGTTTCATTAAGGCTAGTAGTAGTCTCT : 82
ACCAGGAGCTTAGGTTTGGTCTCAAGAAGTCTCGTCAAAGAGGAATA GAGTTGTTTCATTAAGGCTAGTAGTAGTCTCT

*          100         *          120         *          140         *          160
LCYB-a : TTTGGACTAGTTCCTGAAACCAAGAAGGAAAATCTTGAATTTGAGCTTCCCATGTATGACCCATCAAAGGGCCTTGTGTGA : 164
LCYB-b : TTTGGACTAGTTCCTGAAACCAAGAAGGAAAATCTTGAATTTGAGCTTCCCATGTATGACCCATCAAAGGGCCTTGTGTGA : 164
TTTGGACTAGTTCCTGAAACCAAGAAGGAAAATCTTGAATTTGAGCTTCCCATGTATGACCCATCAAAGGGCCTTGTGTGA

*          180         *          200         *          220         *          240
LCYB-a : GACCTAGCAGTTGTCTGGTGGCGGCCCGCTGGGCTTGCTGTGCTCAGCAAGTTTCAGAGGCGGGGCTTTCAGTTTGCTCGA : 246
LCYB-b : GACCTAGCAGTTGTCTGGTGGCGGCCCGCTGGGCTTGCTGTGCTCAGCAAGTTTCAGAGGCGGGGCTTTCAGTTTGCTCGA : 246
GACCTAGCAGTTGTCTGGTGGCGGCCCGCTGGGCTTGCTGTGCTCAGCAAGTTTCAGAGGCGGGGCTTTCAGTTTGCTCGA

*          260         *          280         *          300         *          320
LCYB-a : TTGATCCATCTCCCAAATTGATTTGGCCAAATAAATATGGTGTTTGGTGGATGAATTTGAGGCCATGGATTTGCTTGATTG : 328
LCYB-b : TTGATCCATCTCCCAAATTGATTTGGCCAAATAAATATGGTGTTTGGTGGATGAATTTGAGGCCATGGATTTGCTTGATTG : 328
TTGATCCATCTCCCAAATTGATTTGGCCAAATAAATATGGTGTTTGGTGGATGAATTTGAGGCCATGGATTTGCTTGATTG

*          340         *          360         *          380         *          400         *
LCYB-a : CCTTGATACTACTTGGTCTGGTGTGTTGTGCACATGTATGATAAATACAAAGAAGGATCTTATAGACCTTATGGCAGAGTT : 410
LCYB-b : CCTTGATACTACTTGGTCTGGTGTGTTGTGCACATGTATGATAAATACAAAGAAGGATCTTATAGACCTTATGGCAGAGTT : 410
CCTTGATACTACTTGGTCTGGTGTGTTGTGCACATGTATGATAAATACAAAGAAGGATCTTATAGACCTTATGGCAGAGTT

*          420         *          440         *          460         *          480         *
LCYB-a : AATAGGAAGTTGCTGAAGTCGAAAATGCTGCAAAAATGCATAACCAATGGTGTAAAGTTTCACCAAGCTAAAGTTATTAAGG : 492
LCYB-b : AATAGGAAGTTGCTGAAGTCGAAAATGCTGCAAAAATGCATAACCAATGGTGTAAAGTTTCACCAAGCTAAAGTTATTAAGG : 492
AATAGGAAGTTGCTGAAGTCGAAAATGCTGCAAAAATGCATAACCAATGGTGTAAAGTTTCACCAAGCTAAAGTTATTAAGG

*          500         *          520         *          540         *          560         *
LCYB-a : TTATTCATGAAGAGTCCAAATCTTTGTTGATTTGCAATGATGGTGTGACAATTCAGGCTGCCGTGGTCTTGATGCTACGGG : 574
LCYB-b : TTATTCATGAAGAGTCCAAATCTTTGTTGATTTGCAATGATGGTGTGACAATTCAGGCTGCCGTGGTCTTGATGCTACGGG : 574
TTATTCATGAAGAGTCCAAATCTTTGTTGATTTGCAATGATGGTGTGACAATTCAGGCTGCCGTGGTCTTGATGCTACGGG

*          580         *          600         *          620         *          640         *
LCYB-a : CTTCTCTAGGTTGCTTTGTTCAGTATGATAAACCCTATAATCCAGGTTACCAAGTGGCATATGGAATACTAGCTGAGGTAGAA : 656
LCYB-b : CTTCTCTAGGTTGCTTTGTTCAGTATGATAAACCCTATAATCCAGGTTACCAAGTGGCATATGGAATACTAGCTGAGGTAGAA : 656
TTCTCTAGGTTGCTTTGTTCAGTATGATAAACCCTATAATCCAGGTTACCAAGTGGCATATGGAATACTAGCTGAGGTAGAA

*          660         *          680         *          700         *          720         *          7
LCYB-a : GAGCACCCGTTTGTATTTAGACAAGATGGTTTTTCATGGATTGGAGAGATTCGCATCTGAACAACAATTCGGAGCTCAAAGAGG : 738
LCYB-b : GAGCACCCGTTTGTATTTAGACAAGATGGTTTTTCATGGATTGGAGAGATTCGCATCTGAACAACAATTCGGAGCTCAAAGAGG : 738
GAGCACCCGTTTGTATTTAGACAAGATGGTTTTTCATGGATTGGAGAGATTCGCATCTGAACAACAATTCGGAGCTCAAAGAGG

*          740         *          760         *          780         *          800         *          820
LCYB-a : CAAAATAGCAAAATTCCTACTTTTCTTTATGCCATGCCCTTTTCGTCAAACAGGATATTTCTTGAAGAGACTTCGCTAGTGGC : 820
LCYB-b : CAAAATAGCAAAATTCCTACTTTTCTTTATGCCATGCCCTTTTCGTCAAACAGGATATTTCTTGAAGAGACTTCGCTAGTGGC : 820
CAAAATAGCAAAATTCCTACTTTTCTTTATGCCATGCCCTTTTCGTCAAACAGGATATTTCTTGAAGAGACTTCGCTAGTGGC

*          840         *          860         *          880         *          900
LCYB-a : GCGGCCCTGGAGTGCCAAATGAAAGATATCCAGGAAAGAAATGGTGGCTAGATTAAAGCACTTAGGCATAAAAAGTTAAAGCATT : 902
LCYB-b : GCGGCCCTGGAGTGCCAAATGAAAGATATCCAGGAAAGAAATGGTGGCTAGATTAAAGCACTTAGGCATAAAAAGTTAAAGCATT : 902
GCGGCCCTGGAGTGCCAAATGAAAGATATCCAGGAAAGAAATGGTGGCTAGATTAAAGCACTTAGGCATAAAAAGTTAAAGCATT

*          920         *          940         *          960         *          980
LCYB-a : GAAGAGGATGACCATTTGTCTCATTCCGATGGGTGGGCCCTTCCAGTGTCTCCCAAAAGAGTTGTTGGAATAGGTTGGTACCC : 984
LCYB-b : GAAGAGGATGACCATTTGTCTCATTCCGATGGGTGGGCCCTTCCAGTGTCTCCCAAAAGAGTTGTTGGAATAGGTTGGTACCC : 984
GAAGAGGATGACCATTTGTCTCATTCCGATGGGTGGGCCCTTCCAGTGTCTCCCAAAAGAGTTGTTGGAATAGGTTGGTACCC

*          1000        *          1020        *          1040        *          1060
LCYB-a : CTGGGATGGTGCACCCTTCAACTGGCTATATGGTGGCAAGGACTTTAGCTGCCGCTCCTATTGTTGCAAAATGCAATCGTTCC : 1066
LCYB-b : CTGGGATGGTGCACCCTTCAACTGGCTATATGGTGGCAAGGACTTTAGCTGCCGCTCCTATTGTTGCAAAATGCAATCGTTCC : 1066
CTGGGATGGTGCACCCTTCAACTGGCTATATGGTGGCAAGGACTTTAGCTGCCGCTCCTATTGTTGCAAAATGCAATCGTTCC

*          1080        *          1100        *          1120        *          1140
LCYB-a : AAGCCTCAGTTCTGACAGAAGCATTTCAGGACACAAATTTGCTGCTGAAGTTTGGAAAGATTGTTGGCCCATAGAAAGGAGA : 1148
LCYB-b : AAGCCTCAGTTCTGACAGAAGCATTTCAGGACACAAATTTGCTGCTGAAGTTTGGAAAGATTGTTGGCCCATAGAAAGGAGA : 1148
AAGCCTCAGTTCTGACAGAAGCATTTCAGGACACAAATTTGCTGCTGAAGTTTGGAAAGATTGTTGGCCCATAGAAAGGAGA

*          1160        *          1180        *          1200        *          1220        *
LCYB-a : AGGCAAAGGGAGTTCTTCTGTTTTGGTATGGATATCCTGCTCAAACCTTGACTTACCTGCCACTAGAAGGTTTTTCGATGCTT : 1230
LCYB-b : AGGCAAAGGGAGTTCTTCTGTTTTGGTATGGATATCCTGCTCAAACCTTGACTTACCTGCCACTAGAAGGTTTTTCGATGCTT : 1230
AGGCAAAGGGAGTTCTTCTGTTTTGGTATGGATATCCTGCTCAAACCTTGACTTACCTGCCACTAGAAGGTTTTTCGATGCTT

*          1240        *          1260        *          1280        *          1300        *
LCYB-a : TTTTTGTACTGGAGCCCGTTATTTGGCATGGTTTCTTATCATCGAGATTGTTTCTCCCGAGCTTTTAGTTTTTGGGCTTTC : 1312
LCYB-b : TTTTTGTACTGGAGCCCGTTATTTGGCATGGTTTCTTATCATCGAGATTGTTTCTCCCGAGCTTTTAGTTTTTGGGCTTTC : 1312
TTTTTGTACTGGAGCCCGTTATTTGGCATGGTTTCTTATCATCGAGATTGTTTCTCCCGAGCTTTTAGTTTTTGGGCTTTC

*          1320        *          1340        *          1360        *          1380        *
LCYB-a : TCTATTCTCACATGCCTCTAATACTTCTAGGCTAGAGATCATGGCAAAGGGACTCTTCTCTTGGTTAACAATGATCAACAAC : 1394
LCYB-b : TCTATTCTCACATGCCTCTAATACTTCTAGGCTAGAGATCATGGCAAAGGGACTCTTCTCTTGGTTAACAATGATCAACAAC : 1394
TCTATTCTCACATGCCTCTAATACTTCTAGGCTAGAGATCATGGCAAAGGGACTCTTCTCTTGGTTAACAATGATCAACAAC

*          1400        *          1420        *
LCYB-a : TTGGTACAAGATACAGATTAAGGTGACCAAGGATATTATAAT : 1436
LCYB-b : TTGGTACAAGATACAGATTAAGGTGACCAAGGATATTATAAT : 1436
TTGGTACAAGATACAGATTAAGGTGACCAAGGATATTATAAT

```

Supplementary Fig. S3. The mRNA sequences of *lycopene β-cyclase (LCYB)* alleles, *LCYB-a* and *LCYB-b*, in Newhall and Cara Cara oranges. Note that, no difference in sequence was observed between the two oranges. Start codon and stop codon are underlined by red.

CYCB-a : CTTTCTTTTGTCTTTCTCATTTCCTCTG GCTCTGGCATGGCAACTCTTCTTAGCCCGTTTTCTCCTTCTCCTTTAGCTAAAG : 82  
 CYCB-b : CTTTCTTTTGTCTTTCTCATTTCCTCTG GCTCTGGCATGGCAACTCTTCTTAGCCCGTTTTCTCCTTCTCCTTTAGCTAAAG : 82  
 CTTTCTTTTGTCTTTCTCATTTCCTCTG GCTCTGGCATGGCAACTCTTCTTAGCCCGTTTTCTCCTTCTCCTTTAGCTAAAG

CYCB-a : TTTCCGAAATAATTGATTCAACATCATCAG CTTTCAATTTTC CTATTTCCATTAGGCCGCAAAATGCATGTTCAAGAAAGGC : 164  
 CYCB-b : TTTCCGAAATAATTGATTCAACATCATCAG CTTTCAATTTTC CTATTTCCATTAGGCCGCAAAATGCATGTTCAAGAAAGGC : 164  
 TTTCCGAAATAATTGATTCAACATCATC TTCATTTTC CTATTTCCATTAGGCCGCAAAATGCATGTTCAAGAAAGGC

CYCB-a : GGATCATCATCATCATCACAGGATCCGGACAAGCAAGTTTGGTAACTTCTTAGAGTTGACACCCGGAGTCGG ACCTGAATTC : 246  
 CYCB-b : GGATCATCATCATCATCACAGGATCCGGACAAGCAAGTTTGGTAACTTCTTAGAGTTGACACCCGGAGTCGG ACCTGAATTC : 246  
 GGATCATCATCATCATCACAGGATCCGGACAAGCAAGTTTGGTAACTTCTTAGAGTTGACACCCGGAGTCGG ACCTGAATTC

CYCB-a : TTAGA CTTTGTATCTCCCTGGTTTCATCCGTCGGATTCGATTCGATATGACGTGATCATCATTTGGCACTGGACCGCCGCC : 328  
 CYCB-b : TTAGA CTTTGTATCTCCCTGGTTTCATCCGTCGGATTCGATTCGATATGACGTGATCATCATTTGGCACTGGACCGCCGCC : 328  
 TTAG CTTTGTATCTCCCTGGTTTCATCCGTCGGATTCGATTCGATATGACGTGATCATCATTTGGCACTGGACCGCCGCC

CYCB-a : FCCGCTAGCTGAGCAAGTCTCATCGCGTCATAGT TCAAGGTATGTTGTTGTTGATCCTTCACCTCTTTCTACGTGGCCTAA : 410  
 CYCB-b : FCCGCTAGCTGAGCAAGTCTCATCGCGTCATAGT TCAAGGTATGTTGTTGTTGATCCTTCACCTCTTTCTACGTGGCCTAA : 410  
 FCCGCTAGCTGAGCAAGTCTCATCGCGTCAT GT TCAAGGTATGTTGTTGTTGATCCTTCACCTCTTTCTACGTGGCCTAA

CYCB-a : CAACTATGGAGTTTGGGTTGATGAGTTTGAAGACATAGGACTTCTAGACTGTTTGGACAAAACCTTGGCCGATGACTTGTGTT : 492  
 CYCB-b : CAACTATGGAGTTTGGGTTGATGAGTTTGAAGACATAGGACTTCTAGACTGTTTGGACAAAACCTTGGCCGATGACTTGTGTT : 492  
 CAACTATGGAGTTTGGGTTGATGAGTTTGAAGACATAGGACTT TAGACTGTTTGGACAAAACCTTGGCCGATGACTTGTGTT

CYCB-a : TTTATTAATGATCACAAGACCAAGTATCTAGACAGGCCCTACGGTCGTTGTTAGTAGAAATATTTTGAAGACAAAGTTATTAG : 574  
 CYCB-b : TTTATTAATGATCACAAGACCAAGTATCTAGACAGGCCCTACGGTCGTTGTTAGTAGAAATATTTTGAAGACAAAGTTATTAG : 574  
 TTTATTAATGATCACAAGACCAAGTATCTAGACAGGCCCTACGGTCGTTGTTAGTAGAAATATTTTGAAGACAAAGTTATTAG

CYCB-a : AGAATTTGTTTCAAATGCTGTTAAGTTTCATAAGGCTAAAGTTTGGCA CTTGATCATCAGGAGTTCGAGTCTTCGATTGT : 656  
 CYCB-b : AGAATTTGTTTCAAATGCTGTTAAGTTTCATAAGGCTAAAGTTTGGCA CTTGATCATCAGGAGTTCGAGTCTTCGATTGT : 656  
 AGAATTTGTTTCAAATGCTGTTAAGTTTCATAAGGCTAAAGTTTGGCA GTGATCATCAGGAGTTCGAGTCTTCGATTGT

CYCB-a : TTGTGATGATGGCAATGAGATTAAGGCTAGCTTGTGTTGATGCTAGTGGCTTGTGCTAGTACTTTGTTGATGATAAG : 738  
 CYCB-b : TTGTGATGATGGCAATGAGATTAAGGCTAGCTTGTGTTGATGCTAGTGGCTTGTGCTAGTACTTTGTTGATGATAAG : 738  
 TTGTGATGATGGCAATGAGATTAAGGCTAGCTTGTGTTGATGCTAGTGGCTTGTGCTAGTACTTTGTTGATGATAAG

CYCB-a : CCAAGAAACCATGGATACCAAATTTGCTCATGGGATTTAGCTGAGGTTGAGAGTACCCCTTTTGATTAGAAAATGGTTTC : 820  
 CYCB-b : CCAAGAAACCATGGATACCAAATTTGCTCATGGGATTTAGCTGAGGTTGAGAGTACCCCTTTTGATTAGAAAATGGTTTC : 820  
 CCAAGAAACCATGGATACCAAATTTGCTCATGGGATTTAGCTGAGGTTGAGAGTACCCCTTTTGATTAGAAAATGGTTTC

CYCB-a : TCATGGATTGGAGAGATTCCTCATTAGGGAAATGAGCCTTACTTGGCAGCTAGCAATTTGAAGCTCCCAACTTTCTCTATGC : 902  
 CYCB-b : TCATGGATTGGAGAGATTCCTCATTAGGGAAATGAGCCTTACTTGGCAGCTAGCAATTTGAAGCTCCCAACTTTCTCTATGC : 902  
 TCATGGATTGGAGAGATTCCTCATTAGGGAAATGAGCCTTACTTGGCAGCTAGCAATTTGAAGCTCCCAACTTTCTCTATGC

CYCB-a : AATGCCATTTGATTCAAAATTTGGTATTTTTAGAAGAAACATCTTTGGTTAGTAGGCCAGTTTGTCTATATAAAGAGGTTAAG : 984  
 CYCB-b : AATGCCATTTGATTCAAAATTTGGTATTTTTAGAAGAAACATCTTTGGTTAGTAGGCCAGTTTGTCTATATAAAGAGGTTAAG : 984  
 AATGCCATTTGATTCAAAATTTGGTATTTTTAGAAGAAACATCTTTGGTTAGTAGGCCAGTTTGTCTATATAAAGAGGTTAAG

CYCB-a : AGCAGAAATGGCAGCGAGTTAAGGCATATGGGAATTAGAGTTAAAAGAGTGATTAAGATGAAAAATGTTTGATTCCAAATGG : 1066  
 CYCB-b : AGCAGAAATGGCAGCGAGTTAAGGCATATGGGAATTAGAGTTAAAAGAGTGATTAAGATGAAAAATGTTTGATTCCAAATGG : 1066  
 AGCAGAAATGGCAGCGAGTTAAGGCATATGGGAATTAGAGTTAAAAGAGTGATTAAGATGAAAAATGTTTGATTCCAAATGG

CYCB-a : GAGGTCCTCTGCTGTGATCCC CAAAGTGTGATGGCTATTGGC GCACGCTCTGGTTTATCCATCCTGCAACTGGGTATAT : 1148  
 CYCB-b : GAGGTCCTCTGCTGTGATCCC CAAAGTGTGATGGCTATTGGC GCACGCTCTGGTTTATCCATCCTGCAACTGGGTATAT : 1148  
 GAGGTCCTCTGCTGTGATCCC CAAAGTGTGATGGCTATTGGC GCACGCTCTGGTTTATCCATCCTGCAACTGGGTATAT

CYCB-a : GGTGGCTCGGACCATGGCTCTGGCCCTGCTTGGCTGATGCAATAGCTGATGCCTTGGCTCAACCAGGATGATCAGAGGC : 1230  
 CYCB-b : GGTGGCTCGGACCATGGCTCTGGCCCTGCTTGGCTGATGCAATAGCTGATGCCTTGGCTCAACCAGGATGATCAGAGGC : 1230  
 GGTGGCTCGGACCATGGCTCTGGCCCTGCTTGGCTGATGCAATAGCTGATGCCTTGGCTCAACCAGGATGATCAGAGGC

CYCB-a : AGGCCACTTCATCAGAAAGTGTGGAATGGGTTGTGGCCAATTGACAGAAGATGCAATAGGGAGTTTTATTCAATTTGGTATGG : 1312  
 CYCB-b : AGGCCACTTCATCAGAAAGTGTGGAATGGGTTGTGGCCAATTGACAGAAGATGCAATAGGGAGTTTTATTCAATTTGGTATGG : 1312  
 AGGCCACTTCATCAGAAAGTGTGGAATGGGTTGTGGCCAATTGACAGAAGATGCAATAGGGAGTTTTATTCAATTTGGTATGG

CYCB-a : AGACTTTGTTGAAGCTGGATTTGAAGGGGACTAGGAGATTCCTTTGATGCTTTCTTTGATTGAATCCTCACTACTGGCATGG : 1394  
 CYCB-b : AGACTTTGTTGAAGCTGGATTTGAAGGGGACTAGGAGATTCCTTTGATGCTTTCTTTGATTGAATCCTCACTACTGGCATGG : 1394  
 AGACTTTGTTGAAGCTGGATTTGAAGGGGACTAGGAGATTCCTTTGATGCTTTCTTTGATTGAATCCTCACTACTGGCATGG

CYCB-a : GTTTCCTCCTCAAGGTTGCTCTTGCAGAGCTTGGCCTAAGCTTGTCTCTCTTTGGACACGGCTCGAATTTCTCCAGG : 1476  
 CYCB-b : GTTTCCTCCTCAAGGTTGCTCTTGCAGAGCTTGGCCTAAGCTTGTCTCTCTTTGGACACGGCTCGAATTTCTCCAGG : 1476  
 GTTTCCTCCTCAAGGTTGCTCTTGCAGAGCTTGGCCTAAGCTTGTCTCTCTTTGGACACGGCTCGAATTTCTCCAGG

CYCB-a : TTGGATATTGTTACCAAGTGCCCTCTTCCTCTGGTTAAAATGATGGGGAATCTTGGCCTTGAACCATTGAAGATTAATG : 1558  
 CYCB-b : TTGGATATTGTTACCAAGTGCCCTCTTCCTCTGGTTAAAATGATGGGGAATCTTGGCCTTGAACCATTGAAGATTAATG : 1558  
 TTGGATATTGTTACCAAGTGCCCTCTTCCTCTGGTTAAAATGATGGGGAATCTTGGCCTTGAACCATTGAAGATTAATG

CYCB-a : TTCTTGAATAATAGCGTCTC : 1579  
 CYCB-b : TTCTTGAATAATAGCGTCTC : 1579  
 TTCTTGAATAATAGCGTCTC

**Supplementary Fig. S4.** The mRNA sequences of *chromoplast-specific lycopene β-cyclase (CYCB)* alleles, *CYCB-a* and *CYCB-b*, in Newhall and Cara Cara oranges. Note that, no difference in sequence was observed between the two oranges. Start codon and stop codon are underlined by red.

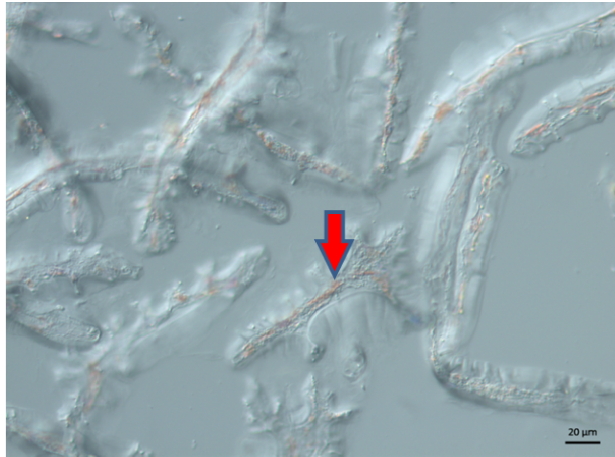

**CPTA treated Newhall  
albedo layers**

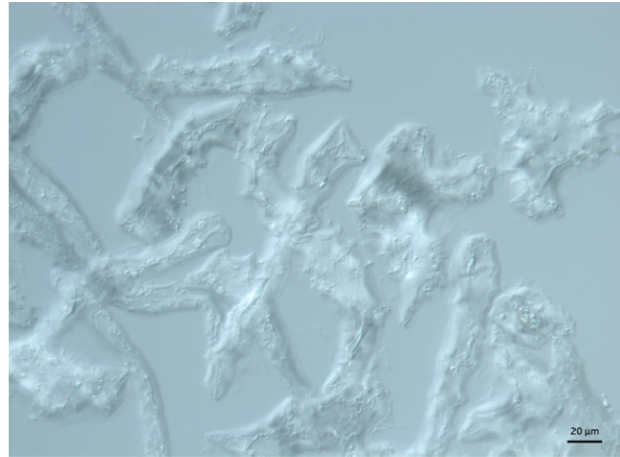

**Control Newhall  
albedo layers**

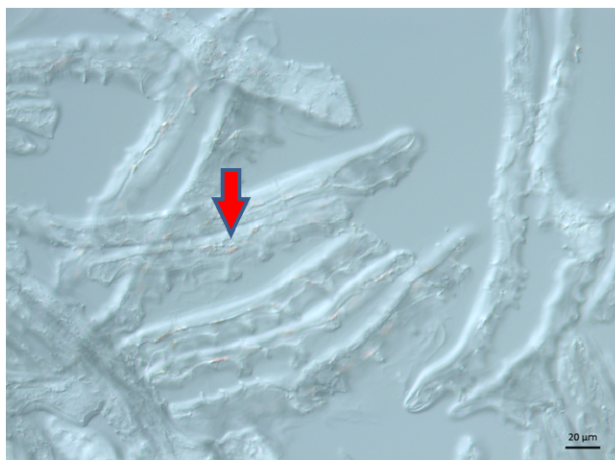

**Control Cara Cara  
albedo layers  
with red chromoplasts**

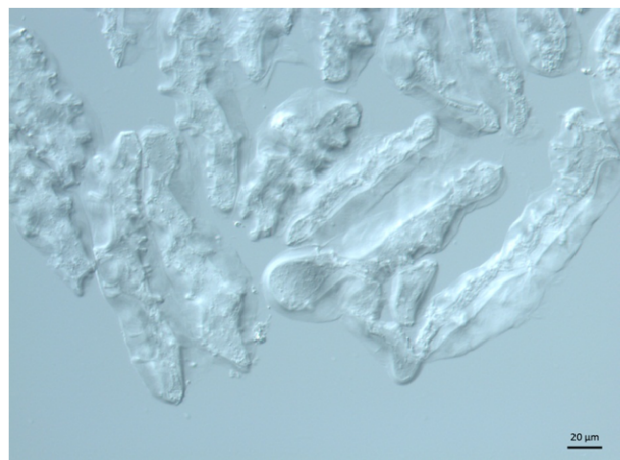

**Control Cara Cara  
albedo layers  
without red chromoplasts**

**Supplementary Fig. S5.** The observation of red crystalline chromoplast under the light microscope in 2-(4-chlorophenylthio)-triethylamine hydrochloride (CPTA) treated albedo layers of Newhall, control Newhall and control Cara Cara oranges. Bar, 20µm.

**Supplementary Table S1.** List of primers for real-time quantitative PCR

| Gene          | Primers (Forward; Reverse)                                             | Genome accession |
|---------------|------------------------------------------------------------------------|------------------|
| <i>Actin</i>  | 5'-CATCCCTCAGCACCTTCC-3';<br>5'-CCAACCTTAGCACTTCTCC-3'                 | Cs1g05000        |
| <i>BCH</i>    | 5'-GTTTGCCATAATCAACGC-3';<br>5'-CTCTCCGAAATAAGGCA-3'                   | Cs9g19270        |
| <i>CCD1</i>   | 5'-GCACGAAATGGAATAGTGGC-3';<br>5'-CTTTAGTAGGAGGAGTCTCG-3'              | Cs7g01710        |
| <i>CRTISO</i> | 5'-ATTTGATAACCCAAGCACTG-3';<br>5'-TGAGGCAGATAATAGGCAAG-3'              | Cs6g13340        |
| <i>CYCB</i>   | 5'-CCCTATTTCATTAGGCCGC-3';<br>5'-CACGTCATATCGAATACGATC-3'              | Cs1g04120        |
| <i>CYCB-a</i> | 5'-GAGCAAGTCTCATCGCGTCATA-3'<br>5'-ACTTTAGCCTTATGAAACTTAACTCCATTTG-3'  |                  |
| <i>CYCB-b</i> | 5'-GCAAGTCTCATCGCGTCATGGTA-3'<br>5'-ACTTTAGC CTTATGAAACCTAACGCCATTTA-3 |                  |
| <i>DXR</i>    | 5'-GAAGTTAAAGTGGCTGATGC-3';<br>5'-GAAGAATCCTGTGTTTCGAC-3'              | Cs5g05440        |
| <i>DXS1</i>   | 5'-CCGCATTCTCATTCCCGACT-3';<br>5'-TTGTGAGTGATACTCTCCTCT-3'             | Cs9g05150        |
| <i>DXS2</i>   | 5'-TTCCGGGATTGCTATTGGAG-3';<br>5'- AAATCAATTTCCAGCCGCC-3'              | Cs1g20530        |
| <i>LCYB</i>   | 5'-GAACCAGGAGCTTAGGTCTG-3';<br>5'-GCTAGGTCTACAACAAGGCC-3'              | orange1.1t00772  |
| <i>LCYE</i>   | 5'-AACCCATCTTGATTGGTCGT-3';<br>5'-AGAAGCAACAGTAGCAAGCCT-3'             | Cs4g14850        |
| <i>NCED2</i>  | 5'-CCATGGCCTTGGACATGGCG-3';<br>5'-TGATGCATTTCGGGGATGGAG-3'             | Cs2g03270        |
| <i>NCED3</i>  | 5'-CTTTAGCCTTGGACGCAGTC-3';<br>5'-GAATGCAGTCGGGGACCTTT-3'              | Cs5g14370        |
| <i>PDS</i>    | 5'-TTCAGCCGATTTGATTTTCC-3';<br>5'-ACACCCTGCTTTCTCATCCA-3'              | orange1.1t02361  |
| <i>PSY1</i>   | 5'-CTACAATGCAGCATTGGCAC-3';<br>5'-CATGAAGTTTCTCCATTTAATGG-3'           | Cs6g15910        |
| <i>PSY1-a</i> | 5'-CAAGATGAGTTGGCACAGGCA-3'<br>5'-AGCCCATAACCGGCCATCG-3'               |                  |
| <i>PSY1-b</i> | 5'-CAAGATGAGTTGGCACAGGCG-3'<br>5'-GAAGCCCATAACCGGCCATCT-3'             |                  |
| <i>PSY2</i>   | 5'-TTACAATGCAGCATTGGCCT-3';<br>5'-CATGAAGTTTCTCCATTTATTAAT-3'          | orange1.1t00657  |
| <i>VDE</i>    | 5'-ACCGAATGCCAGATCAAATGTGG-3';<br>5'-CCACCATATCCATCCCATGC(A/G)TC-3'    | Cs5g26080        |
| <i>ZDS</i>    | 5'-TCATCCCAAGGTTTAGAAG-3';<br>5'-TACCAGACAAAGTTGCTCC-3'                | orange1.1t06069  |
| <i>ZEP</i>    | 5'-ACTTGTTACTGGAATTGCAGA-3';<br>5'-CCCATATTTGGCTGCATAGCATG-3'          | orange1.1t04051  |
| <i>ZISO</i>   | 5'-ACTCCGTCTCCTCCCTTCA-3';<br>5'-TTACCTGCCCAACCATCTGT-3'               | Cs5g24730        |

**Supplementary Table S2.** Effects of 2-(4-chlorophenylthio)-triethylamine hydrochloride (CPTA) and norflurazon treatments on accumulation of carotenoids in *in vitro* cultured flesh tissues of Newhall and Cara Cara. The 0 week tissues were separated from fruit at S5 stage.

| Treatment                             | Contents ( $\mu\text{g g}^{-1}$ FW) |                    |                    |                     |                    |                    |                          |                    |                     |
|---------------------------------------|-------------------------------------|--------------------|--------------------|---------------------|--------------------|--------------------|--------------------------|--------------------|---------------------|
|                                       | Phytoene                            | Phytofluene        | $\beta$ -Carotene  | Lycopene            | Violaxanthin       | Luteoxanthin       | <i>cis</i> -Violaxanthin | Others             | Total carotenoids   |
| Control<br>(2 weeks)<br>Newhall       |                                     |                    |                    |                     | 0.20<br>$\pm 0.05$ | 0.20<br>$\pm 0.02$ | 0.56<br>$\pm 0.11$       | 0.12<br>$\pm 0.02$ | 1.08<br>$\pm 0.13$  |
| Control<br>(2 weeks)<br>Cara Cara     | 24.07<br>$\pm 0.20$                 | 3.87<br>$\pm 0.17$ | 0.14<br>$\pm 0.08$ | 5.85<br>$\pm 0.30$  | 0.12<br>$\pm 0.03$ | 0.11<br>$\pm 0.02$ | 0.36<br>$\pm 0.05$       | 0.57<br>$\pm 0.05$ | 35.08<br>$\pm 0.70$ |
| CPTA<br>(2 weeks)<br>Newhall          | 1.60<br>$\pm 0.07$                  | 0.39<br>$\pm 0.03$ |                    | 13.91<br>$\pm 0.89$ |                    |                    | 0.14<br>$\pm 0.01$       | 1.41<br>$\pm 0.11$ | 17.44<br>$\pm 1.02$ |
| CPTA<br>(2 weeks)<br>Cara Cara        | 10.64<br>$\pm 0.49$                 | 1.91<br>$\pm 0.11$ | 0.24<br>$\pm 0.03$ | 7.39<br>$\pm 0.45$  |                    |                    | 0.03<br>$\pm 0.02$       | 0.82<br>$\pm 0.01$ | 21.04<br>$\pm 0.98$ |
| Norflurazon<br>(2 weeks)<br>Newhall   | 32.22<br>$\pm 0.53$                 | 1.77<br>$\pm 0.03$ |                    |                     | 0.01<br>$\pm 0.00$ | 0.03<br>$\pm 0.00$ | 0.04<br>$\pm 0.00$       |                    | 34.07<br>$\pm 0.55$ |
| Norflurazon<br>(2 weeks)<br>Cara Cara | 46.60<br>$\pm 1.34$                 | 3.04<br>$\pm 0.08$ |                    | 2.62<br>$\pm 0.17$  |                    |                    | 0.02<br>$\pm 0.01$       | 0.53<br>$\pm 0.03$ | 52.81<br>$\pm 1.48$ |
| Control<br>(4 weeks)<br>Newhall       | 0.03<br>$\pm 0.03$                  |                    |                    |                     | 0.17<br>$\pm 0.01$ | 0.27<br>$\pm 0.02$ | 0.60<br>$\pm 0.05$       | 0.41<br>$\pm 0.03$ | 1.48<br>$\pm 0.04$  |
| Control<br>(4 weeks)<br>Cara Cara     | 33.44<br>$\pm 1.44$                 | 5.33<br>$\pm 0.24$ |                    | 5.37<br>$\pm 0.46$  | 0.10<br>$\pm 0.02$ | 0.19<br>$\pm 0.05$ | 0.37<br>$\pm 0.04$       | 0.85<br>$\pm 0.09$ | 45.64<br>$\pm 2.24$ |
| CPTA<br>(4 weeks)<br>Newhall          | 2.52<br>$\pm 0.03$                  | 0.83<br>$\pm 0.02$ |                    | 18.13<br>$\pm 0.69$ | 0.05<br>$\pm 0.00$ | 0.03<br>$\pm 0.00$ | 0.24<br>$\pm 0.00$       | 1.40<br>$\pm 0.06$ | 23.20<br>$\pm 0.80$ |
| CPTA<br>(4 weeks)<br>Cara Cara        | 31.48<br>$\pm 1.28$                 | 6.25<br>$\pm 0.23$ |                    | 16.64<br>$\pm 0.74$ | 0.02<br>$\pm 0.00$ |                    | 0.08<br>$\pm 0.02$       | 1.47<br>$\pm 0.05$ | 55.95<br>$\pm 2.29$ |
| Norflurazon<br>(4 weeks)<br>Newhall   | 60.09<br>$\pm 3.37$                 | 4.13<br>$\pm 0.20$ |                    |                     | 0.04<br>$\pm 0.01$ | 0.07<br>$\pm 0.00$ | 0.13<br>$\pm 0.02$       | 0.08<br>$\pm 0.01$ | 64.54<br>$\pm 3.59$ |
| Norflurazon<br>(4 weeks)<br>Cara Cara | 82.76<br>$\pm 2.15$                 | 5.10<br>$\pm 0.17$ |                    | 0.64<br>$\pm 0.00$  |                    | 0.03<br>$\pm 0.00$ | 0.05<br>$\pm 0.02$       | 0.24<br>$\pm 0.04$ | 88.82<br>$\pm 2.31$ |



**Supplementary Table S3.** List of primers for full-length gene cloning

---

| Gene        | Primers (Forward; Reverse)                                      |
|-------------|-----------------------------------------------------------------|
| <i>CYCB</i> | 5'- CTTTCTTTTGTCTTTCTCATTTC-3'<br>5'- GAGACGCTAATTATTCAAGAAC-3' |
| <i>LCYB</i> | 5'-TGAAGATTCAGAACCAGGAG-3'<br>5'- GCATGAGTTATTAAGCACATTA-3'     |
| <i>PSYI</i> | 5'-CTACAGAGAGTTGAAGTTACAGGG-3'<br>5'-TAGGGCATCGGCCTTGGATTGTG-3' |

---
